# Supplementary material for: Intergenerational genomic DNA methylation patterns in mouse hybrid strains
Source: PubMed Central journal article supplement (PMC4076608; doi:10.1186/gb-2014-15-5-r68), 2014-04-30

**Figure S5. Validation of AMRs by traditional bisulfite sequencing**

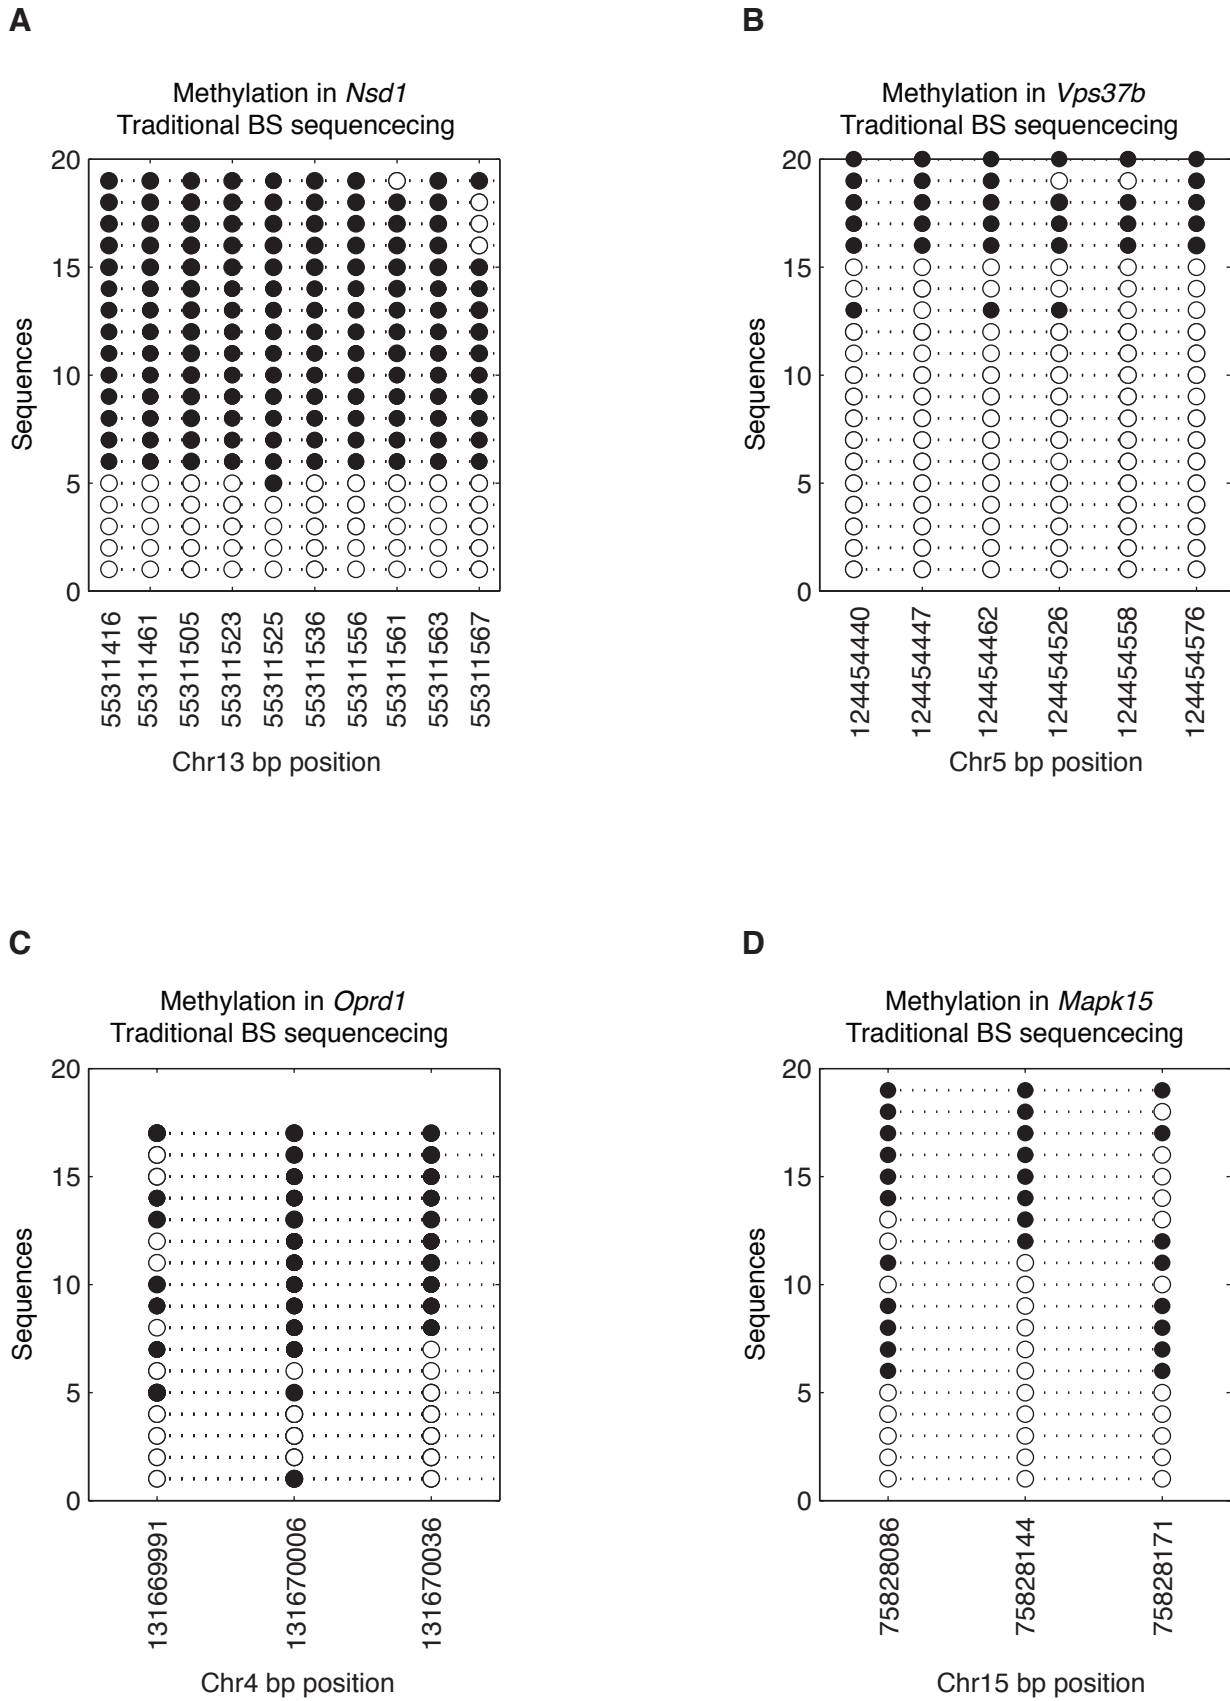

Supplement: gb-2014-15-5-r68-S7.pdf [file gb-2014-15-5-r68-S7.pdf]
