# Supplementary material for: Intergenerational genomic DNA methylation patterns in mouse hybrid strains
Source: PubMed Central journal article supplement (PMC4076608; doi:10.1186/gb-2014-15-5-r68), 2014-04-30

**Figure S6. Intergenerational methylation differences**

**A**

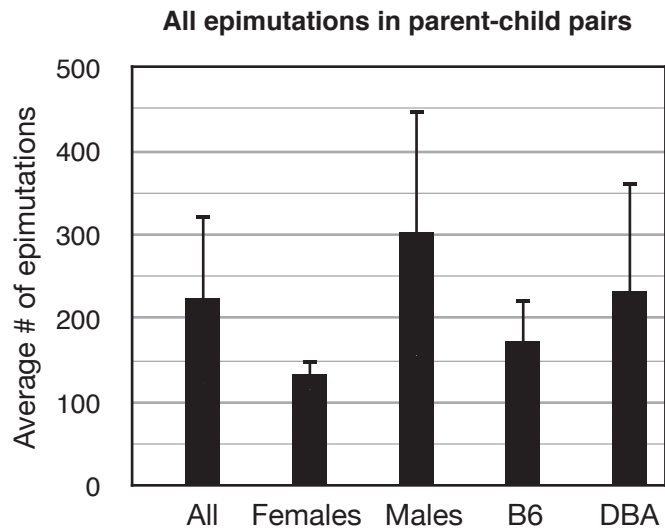

**B**

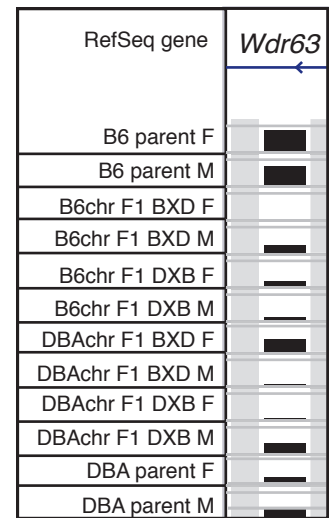

**C**

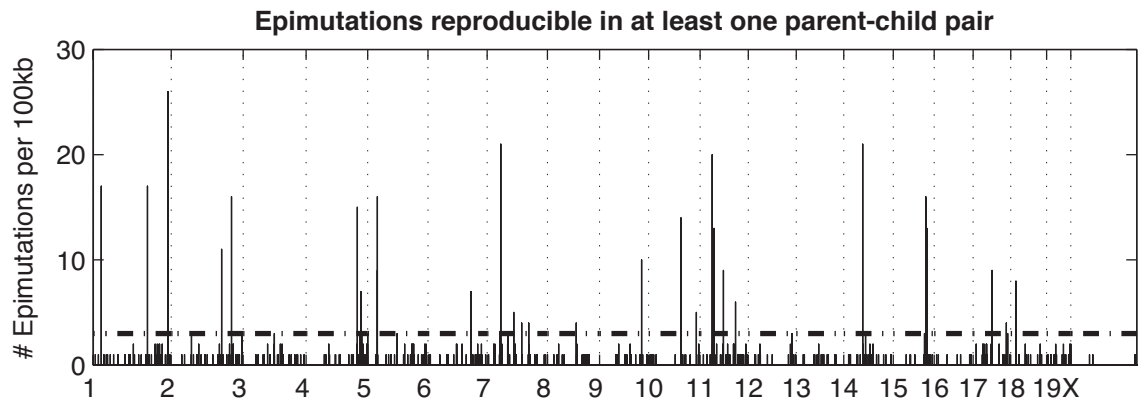

**D**

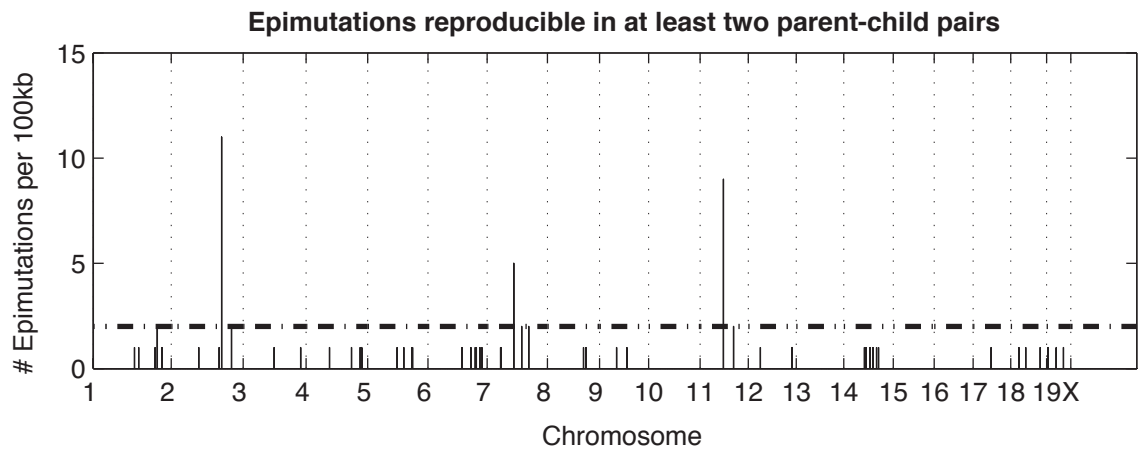

Supplement: gb-2014-15-5-r68-S8.pdf [file gb-2014-15-5-r68-S8.pdf]
